# Supplementary material
Source: HighWire-hosted journal article supplement (http://www.qdcxjkg.com/highwire/filestream/130220/field_highwire_adjunct_files/0/ERJ-00039-2016_Supplement.pdf)
Supplement: ERJ-00039-2016_Supplement.pdf [file ERJ-00039-2016_Supplement.pdf]

1  
2  
3  
4  
5  
6  
7  
8  
9  
10  
11  
12  
13  
14  
15  
16  
17  
18  
19  
20  
21  
22  
23  
24

**Supplementary material**

**Predictive and Prognostic Factors in patients with Blood Culture Positive Community-Acquired Pneumococcal Pneumonia**

Rosanel Amaro<sup>1</sup>, Adamantia Liapikou<sup>2</sup>, Catia Cilloniz<sup>1</sup>, Albert Gabarrus<sup>1</sup>, Francesc Marco<sup>3-4</sup>, Jacobo Sellares<sup>1</sup>, Eva Polverino<sup>1</sup>, Javier Garau<sup>5</sup>, Miquel Ferrer<sup>1</sup>, Daniel M. Musher<sup>6</sup>, Antoni Torres<sup>1</sup>

<sup>1</sup> Department of Pneumology, Hospital Clinic of Barcelona- Institut d'Investigacions Biomèdiques August Pi i Sunyer (IDIBAPS), University of Barcelona, Ciber de Enfermedades Respiratorias (CIBERES).

<sup>2</sup> Respiratory Department, Sotiria Chest Diseases Hospital, Mesogion 152, Athens, Greece.

<sup>3</sup> Department of Microbiology Centre Diagnostic Biomèdic (CDB). Hospital Clinic of Barcelona, Barcelona, Spain.

<sup>4</sup> Institut de Salut Global, Barcelona, Hospital Clinic Universitat de Barcelona, Spain.

<sup>5</sup> Department of Medicine, Hospital Universitari Mutua de Terrassa, Terrassa, Barcelona, Spain.

<sup>6</sup> Department of Medicine, Baylor College of Medicine, Houston, Texas, USA.

**Corresponding Author:**

Antoni Torres, MD, PhD

Department of Pneumology, Hospital Clinic of Barcelona

- 1 C/ Villarroel 170, 08036 Barcelona, Spain
- 2 Phone: (+34) 93-227-5779, FAX: (+ 34) 93-227-9813
- 3 Email: [atorres@clinic.ub.es](mailto:atorres@clinic.ub.es)

## 1 **Materials and Methods**

### 2 **Study Design and Patients**

3 Exclusion criteria included the following: a) severe immunosuppression, such as  
4 solid-organ or bone-marrow transplantation or human immunodeficiency virus (HIV),  
5 or receiving chemotherapy or other immunosuppressive drugs (>20 mg prednisone-  
6 equivalent per day for 2 weeks or more); b) hospitalization in the preceding 21 days; c)  
7 active tuberculosis and d) functional or anatomical asplenia. Nursing home patients  
8 were not excluded.

### 9 **Data collection**

10 The following parameters were recorded at admission to the Emergency  
11 Department: age, sex, current smoking, alcohol habits, and drug use, co-morbidities,  
12 antibiotic treatment in the previous 30 days prior to ED admission, treatment with  
13 corticosteroids, clinical symptoms and features, clinical signs, laboratory findings,  
14 arterial blood gas measurements, diagnostic procedures, empiric antibiotic therapy,  
15 need for ventilator support, pulmonary complications, and other clinical events.

### 16 **Microbiologic Evaluation**

17 Microbiologic examination was performed in all patients at admission on  
18 sputum, urine, two samples of blood and nasopharyngeal swabs. All blood cultures  
19 were taken before antibiotic treatment. In some patients blood cultures were obtained  
20 after admission but we only included those patients with blood culture drawn at  
21 admission. Pleural fluid, tracheobronchial aspirates (TBAS) and bronchoalveolar lavage  
22 (BAL) fluid, when available, were collected for Gram and Ziehl-Nielsen stains and for  
23 cultures for bacterial, fungal and mycobacterial pathogens.

1 Sputum and blood samples were obtained for bacterial culture before the start  
2 of antibiotic therapy in the emergency department. Urine samples for *S. pneumoniae*  
3 and *Legionella pneumophila* antigen detection were obtained within 24 hours of  
4 hospital admission.

5 Minimal inhibitory concentrations (MICs) were determined by a microdilution  
6 method (Sensititre, Trek Diagnostic Systems Ltd, West Sussex, England) or by E-Test  
7 (bioMérieux SA, Marcy-l'Etoile, France). Results were interpreted according to  
8 breakpoints stated in the CLSI documents<sup>1</sup>.

9 As we mention in previous studies<sup>2</sup>, isolates were defined to be penicillin non  
10 susceptible *S. pneumoniae* (MIC  $\geq 2$  mg/mL) or penicillin-resistant *S. pneumoniae* (MIC  
11  $> 8$  mg/mL).

## 12 **Definitions**

13 Pulmonary complications were defined as the presence of one or more of the  
14 following: pleural effusion, empyema, multilobar infiltrates (infiltrates involving 2 or  
15 more lobes) and respiratory distress at the initial presentation according to a previous  
16 publication by our group<sup>3</sup>.

17 Severe pneumonia definition includes patients with one of the 2 major severity  
18 criteria (mechanical ventilation on septic shock) or the presence of the least 3 minor  
19 criteria (respiratory rate  $\geq 30$  breaths per minute,  $PO_2/FiO_2 < 250$ , multilobar, altered  
20 mental status, leukocytes  $< 4,000 \times 10^9/L$ , platelets  $< 100 \times 10^9/L$ , temperature  $< 36.0$  °C,  
21 systolic blood pressure  $< 90$  mmHg and creatinine  $\geq 1.5$  mg/dL) according to ATS/IDSA  
22 guidelines<sup>4</sup>.

1 Prior antibiotic treatment was defined as the previous antibiotic used within 2  
2 weeks before the admission and given for the current episode of pneumonia. The  
3 information of antibiotic therapy was given by the patient at admission.

4 Data on clinical outcomes were collected including mortality due to all causes, length  
5 of hospital stay, intensive-care unit (ICU) admission, need for mechanical ventilation  
6 and septic shock.

7 PSI score stratified according to 30-day risk mortality for CAP: risk classes I-III  
8 ( $\leq 90$  points) have low mortality (range, 0%-10%) and risk class IV (91-130 points) and  
9 risk class V ( $>130$  points) have the highest mortality (range, 10%-35%). CURB-65 score  
10 stratified according to 30-day mortality for CAP: risk classes 0-1 have low mortality  
11 (range, 1%-3%), risk class 2 has moderate mortality (7%) and risk classes 3-5 have the  
12 highest mortality (range, 14%-28%).

13 Appropriateness of empiric antibiotic treatment in all patients was defined  
14 according to Guidelines of the Spanish Society of Pulmonology and Thoracic Surgery  
15 (SEPAR) treatment<sup>5</sup>. Appropriateness of empiric antimicrobial treatment in patients  
16 was defined when the isolated pathogens were susceptible in vitro to  $\geq 1$  of the  
17 antimicrobials agents administered<sup>6</sup>.

## 18 **Statistical Analysis**

19 To identify factors associated with bacteremic pneumococcal pneumonia we  
20 used a logistic regression model. Variables were included in the multivariate model  
21 when univariate comparisons yielded a level of significance of  $p < 0.10$ . The following  
22 variables were tested: year of occurrence of pneumonia ( $< 2007$  vs.  $\geq 2007$ ), age ( $< 65$   
23 vs.  $\geq 65$  years), gender, influenza and pneumococcal vaccination, systemic and inhaled  
24 corticosteroids, prior antibiotic treatment, chronic pulmonary disease, chronic

1 cardiovascular disease, chronic renal disease, chronic liver disease, diabetes mellitus,  
2 neurological disease, pneumonia in the past year, nursing home resident, cough,  
3 sputum, dyspnoea, pleuritic pain, fever, confusion, creatinine (<1.5 vs. ≥1.5 mg/dL), C-  
4 reactive protein (CRP) (<20 vs. ≥20 mg/dL), white-blood-cell count (<10 vs. ≥10 x  
5 10<sup>9</sup>/L), SatO<sub>2</sub> (<92 vs. ≥92%), PaO<sub>2</sub>/FiO<sub>2</sub> (<250 vs. ≥250), CURB-65 (1-2 vs. 3-5), PSI risk  
6 class (I-III vs. IV-V), pulmonary and systemic complications, and need for mechanical  
7 ventilation. A backward stepwise selection ( $p_{in}<0.05$ ,  $p_{out}<0.10$ ) was used to determine  
8 factors predictive of bacteremia, with adjustment for 3 predefined covariates (i.e., the  
9 year of occurrence of pneumonia, the age group, and the gender). To identify the  
10 problem of collinearity, we calculated the r coefficient of two variables. If two  
11 independent variables were highly correlated ( $r >|\pm 0.30|$ ), the variable with the  
12 largest variance was excluded from the multivariate analysis<sup>7</sup>. The association with  
13 outcomes (i.e., ICU admission, prolonged length of hospital stay (LOS) [LOS>8 days;  
14 cut-off value the median value of LOS], and 30-day mortality) was also tested in  
15 univariate and multivariate analysis, and similar inclusion criteria were applied for the  
16 logistic regression analysis ( $p<0.10$ ). The following additional variables were tested for:  
17 1) ICU admission: antibiotic therapy, LOS, and bacteremia pneumococcal pneumonia  
18 group; 2) prolonged LOS: antibiotic therapy, site of care, and bacteremia  
19 pneumococcal pneumonia group, and 3) 30-day mortality: antibiotic therapy, site of  
20 care, LOS, and bacteremia pneumococcal pneumonia group. Receiver operating  
21 characteristic (ROC) curves were constructed to determine the best cut-off points for  
22 C-reactive protein (CRP) (see Figure E1). Youden's index<sup>8</sup> is defined for all points of the  
23 ROC curve, and the maximum value of the index was used as a criterion for selecting  
24 the optimum cut-off point.

## 1 Results

### 2 Etiologic Diagnosis in the BCNPP Patients

3 *S. pneumoniae* antigen was detected in the urine of 384 patients (70%) in the  
4 non-BPP group. In sputum cultures, *S. pneumoniae* was the most frequently isolated  
5 bacterium, found in 218 patients (41%). In 19 of these cases *S. pneumoniae* was  
6 predominant but another potential pathogen was isolated (18 *Haemophilus influenzae*  
7 and 1 *Staphylococcus aureus*). In addition, *S. pneumoniae* was isolated in 40 patients  
8 (9%) from bronchial aspirate samples. In 1 of these cases another potential pathogen  
9 was isolated (*Staphylococcus aureus*). Susceptibility data are described in detail in  
10 Table E2. One hundred twenty-three of the 523 pneumococcal isolates (24%) were  
11 penicillin resistant (defined as a minimum inhibitory concentration of penicillin  $\geq 2$   
12 mg/mL), with BCPPP patients showing a lower rate of resistance than non-bacteremic  
13 patients (20% vs. 29%,  $p=0.015$ ). In BCPPP patients, we also observed a lower rate of  
14 erythromycin resistance compared to BCNPP patients (14% vs. 27%,  $p<0.001$ ).

15

### 16 Empirical Antibiotic Therapy

17 Antibiotic therapy was selected by the admitting physicians in accord with their  
18 usual practice. The majority of BCPPP patients (308 [85%]) received 2 antibiotics, the  
19 most frequent of which were a  $\beta$ -lactam with a macrolide (164 [45%]) or a  $\beta$ -lactam  
20 with a quinolone (100 [28%]) (see Table E3). The combination of azithromycin with  
21 ceftriaxone was used more frequent in BCPPP than in non-BPP patients (91 [25%] vs.  
22 92 [17%],  $p=0.002$ ). In the BCNPP group, a greater number of patients received a  
23 quinolone (98 [18%]) vs. (34 [9%],  $p<0.001$ ). The empiric antibiotic treatment was not

1 in accord with accepted guidelines in only 3 of 361 (1%) BCPPP patients and 12 of 548  
2 (2%) non-BPP patients (p=0.12).

#### 4 **Predictors of BCPPP**

5 The area under the ROC curve, the sensitivity, and the specificity of each item  
6 analyzed univariately are shown in Figures E3, E4, E5, and E6.

7 The area under the ROC curve was 0.69 (95% CI 0.63-0.75) for the model  
8 predictive of bacteremia (76% sensitivity, 58% specificity, 58% positive predictive  
9 value, 76% negative predictive value, 2.37 positive likelihood ratio, and 0.42 negative  
10 likelihood ratio) (see Figure E2).

11 Predictors from the model were used to calculate the probability of bacteremia  
12 using the following formula:  $\text{Exp}(\beta) / (1+\text{Exp}(\beta))$  where  $\beta = -1.327 + 0.110$  (if year of  
13 occurrence of pneumonia <2007) - 0.141 (if age  $\geq 65$  years) + 0.026 (in the case of  
14 women) - 2.101 (in the case of nursing home resident) + 0.523 (in the case of  
15 multilobar involvement) + 0.709 (in the case of pleural effusion) + 0.858 (if CRP  $\geq 20$   
16 mg/dL). Using this model, the probability of pneumococcal bacteremia for patients  
17 without any of these risk factors and with the protective factors was 3%, compared to  
18 71% for patients with all the risk factors and without the protective factors.

#### 19 **Outcomes and Prognostic Factors**

20 In the subgroup of patients requiring ICU admission, the multivariate analysis  
21 showed that age  $\geq 65$  years, chronic liver disease and need for invasive mechanical  
22 ventilation were independently associated with 30-day mortality (see Table E7). Cough  
23 was found as protective factor. Bacteremia was not a factor associated with 30-day  
24 mortality in this population. The area under the ROC curve was 0.86 (0.80-0.92).



1            In the subgroup of patients with BPP, the multivariate analysis showed that  
2    confusion, respiratory distress, acute renal failure and septic shock were  
3    independently associated with 30-day mortality (see Table E8). Pleuritic pain and fever  
4    were found as protective factors. Combination antibiotic therapy was not a factor  
5    associated with 30-day mortality in BPP. The area under the ROC curve was 0.93 (0.86-  
6    1.00).

References

1. Cockerill III FR, Wikler MA, Adler J et al. Performance standards for antimicrobial susceptibility testing; twenty-second informational supplement. Clinical and Laboratory Standards Institute 2012; 32(3):1-184.
2. Cilloniz C, Albert RK, Liapikou A, Gabarrus A, Rangel E, Bello S, Marco F, Mensa J, Torres A. The Effect of Macrolide Resistance on the Presentation and Outcome of Patients Hospitalized for Streptococcus pneumoniae Pneumonia. Am J Respir Crit Care Med. 2015 Jun 1;191(11):1265-72.
3. Cilloniz C, Ewig S, Polverino E et al. Pulmonary complications of pneumococcal community-acquired pneumonia: incidence, predictors, and outcomes. Clin Microbiol Infect 2012; 18(11):1134-1142.
4. Mandell, L. A., R. G. Wunderink, A. Anzueto, J. G. Bartlett, G. D. Campbell, N. C. Dean, S. F. Dowell, T. M. File, Jr., D. M. Musher, M. S. Niederman, A. Torres, and C. G. Whitney. 2007. Infectious Diseases Society of America/American Thoracic Society consensus guidelines on the management of community-acquired pneumonia in adults. Clin Infect Dis. 44 Suppl 2:S27-S72.
5. Menendez R, Torres A, Aspa J et al. [Community acquired pneumonia. New guidelines of the Spanish Society of Chest Diseases and Thoracic Surgery (SEPAR)]. Arch Bronconeumol 2010; 46(10):543-558.
6. Torres A, Barberan J, Falguera M et al. [Multidisciplinary guidelines for the management of community-acquired pneumonia]. Med Clin (Barc) 2013; 140(5):223.
7. Healey JF. Statistics: a tool for social research. Belmont, CA: Wadsworth Publishing Company; 1993.
8. Youden WJ. Index for rating diagnostic tests. Cancer 1950; 3(1):32-35.

1 **Figure E1. Receiver operating characteristic curve analysis to determine the best cut-**  
2 **off points for C-reactive protein for the ability to predict bacteremia**

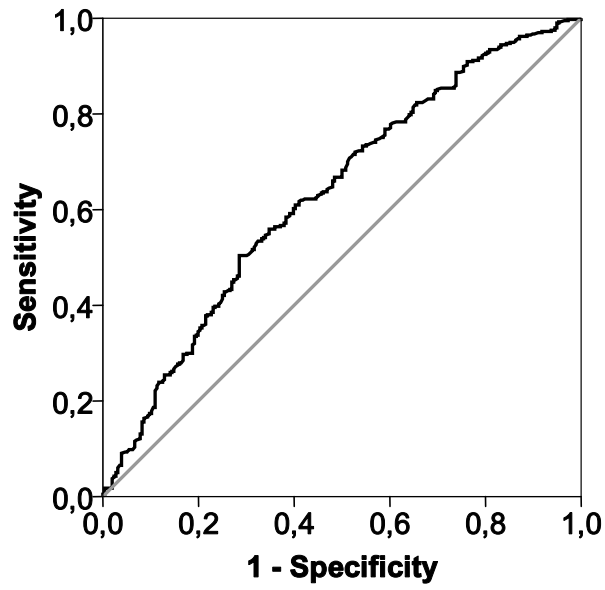

AUC 0.63, 95% CI 0.59-0.68

3  
4  
5  
6  
7  
8  
9  
10  
11  
12  
13  
14  
15  
16  
17  
18  
19  
20  
21  
22  
23  
24  
25  
26  
27  
28  
29  
30  
31  
32  
33  
34  
35  
36  
37  
38  
39  
40  
41  
42  
43  
44  
45  
46  
47

1 **Figure E2. Receiver operating characteristic curve analysis of significant variables**  
2 **derived from the logistic regression model for the ability to predict bacteremia**  
3

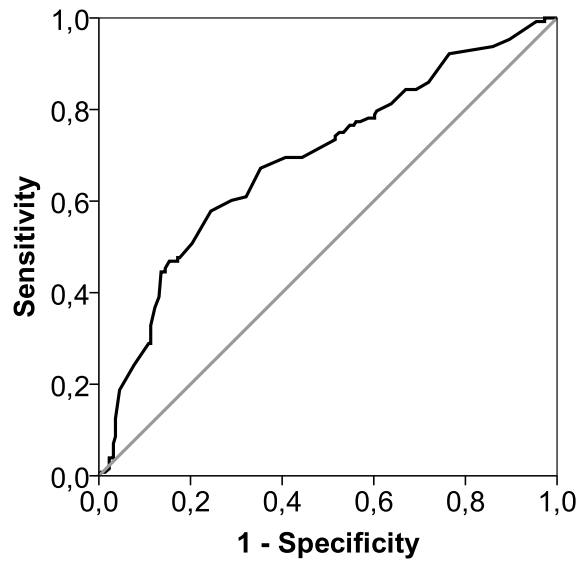

**AUC 0.69, 95% CI 0.63-0.75**  
**Sensitivity 76%, Specificity 57%**

4  
5  
6  
7  
8  
9  
10  
11  
12  
13  
14  
15  
16  
17  
18  
19  
20  
21  
22  
23  
24  
25  
26  
27  
28  
29  
30  
31

**Figure E3. Receiver operating characteristic curve analysis of nursing home resident for the ability to predict bacteremia**

1

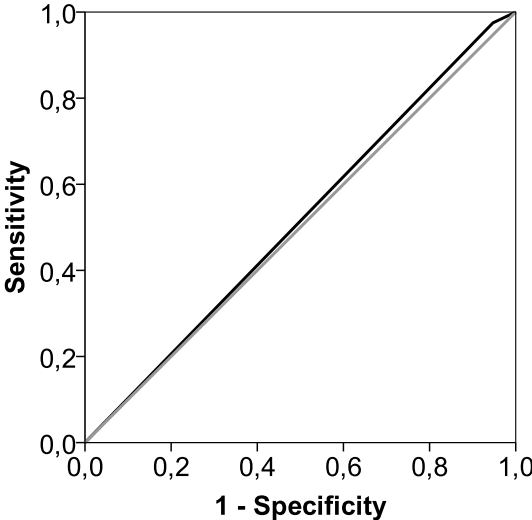

2

3

4

5

6

7

8

9

10

11

12

13

14

15

16

17

18

19

20

21

22

23

24

25

26

27

28

29

30

31

32

**AUC 0.51, 95% CI 0.48-0.55**  
**Sensitivity 97%, Specificity 5%**

1 **Figure E4. Receiver operating characteristic curve analysis of multilobar involvement**  
2 **for the ability to predict bacteremia**

3

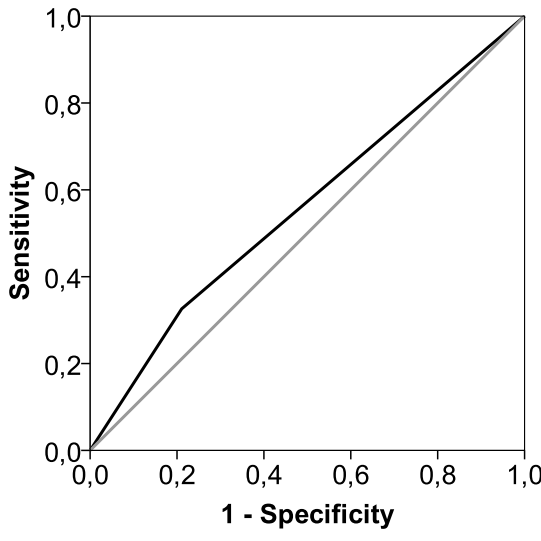

4  
5  
6  
7  
8  
9  
10  
11  
12  
13  
14  
15  
16  
17  
18  
19  
20  
21  
22  
23  
24  
25  
26  
27  
28  
29  
30  
31  
32  
33  
34

**AUC 0.56, 95% CI 0.52-0.60**  
**Sensitivity 33%, Specificity 79%**

1 **Figure E5. Receiver operating characteristic curve analysis of pleural effusion**  
2 **for the ability to predict bacteremia**

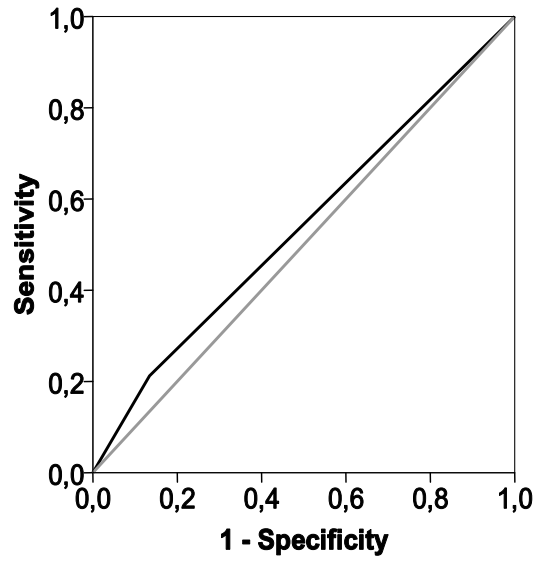

19 **AUC 0.54, 95% CI 0.50-0.58**  
20 **Sensitivity 21%, Specificity 87%**

3  
4  
5  
6  
7  
8  
9  
10  
11  
12  
13  
14  
15  
16  
17  
18  
21  
22  
23  
24  
25  
26  
27  
28  
29  
30  
31  
32  
33  
34  
35  
36  
37  
38  
39  
40  
41  
42  
43  
44  
45  
46  
47

1 **Figure E6. Receiver operating characteristic curve analysis of C-reactive protein**  
2 **for the ability to predict bacteremia**

3  
4  
5  
6  
7  
8  
9

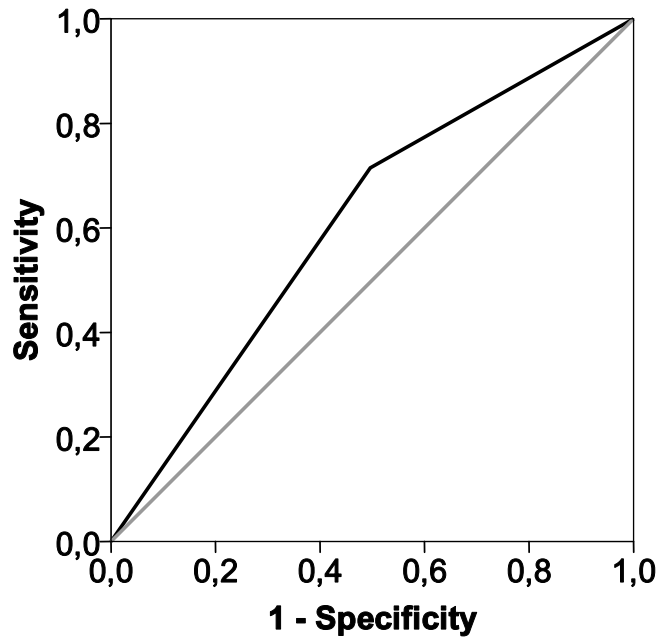

**AUC 0.61, 95% CI 0.57-0.65**  
**Sensitivity 71%, Specificity 50%**



1 **Table E1. Diagnosis samples of Pneumococcal Pneumonia**

|                 | <b>Blood culture positive pneumococcal pneumonia (n=362)</b> | <b>Blood culture negative pneumococcal pneumonia (n=555)</b> | <b>Total (n=917)</b> |
|-----------------|--------------------------------------------------------------|--------------------------------------------------------------|----------------------|
| Blood culture   | 362/362 (100)                                                | 0/555 (0)                                                    | 362/917 (39)         |
| Sputum          | 52/164 (32)                                                  | 199/370 (54)                                                 | 251/534 (47)         |
| T-BAS/BAL       | 10/35 (29)                                                   | 39/70 (56)                                                   | 49/105 (47)          |
| Pleural Fluid   | 14/64 (22)                                                   | 0/43 (0)                                                     | 14/107 (13)          |
| Urinary antigen | 141/176 (80)                                                 | 384/435 (88)                                                 | 525/611 (86)         |

2 Data are shown as number of patients with Pneumococcal Pneumonia / number of  
 3 patients for each microbiologic examination performed (%).

4

1 **Table E2. Antibiotic Resistance According to Groups**

|              |              | <b>Bacteremic<br/>pneumococcal<br/>pneumonia<br/>(n=362)</b> | <b>Non-bacteremic<br/>pneumococcal<br/>pneumonia<br/>(n=555)</b> | <b>Total</b> |
|--------------|--------------|--------------------------------------------------------------|------------------------------------------------------------------|--------------|
| Penicillin   | Sensitive    | 266 (80)                                                     | 134 (71)                                                         | 400 (76)     |
|              | Intermediate | 27 (8)                                                       | 29 (15)                                                          | 56 (11)      |
|              | Resistant    | 40 (12)                                                      | 27 (14)                                                          | 67 (13)      |
| Erythromycin | Sensitive    | 278 (86)                                                     | 138 (73)                                                         | 416 (81)     |
|              | Intermediate | 1 (0.3)                                                      | 2 (1)                                                            | 3 (1)        |
|              | Resistant    | 46 (14)                                                      | 50 (26)                                                          | 96 (19)      |
| Cefotaxime   | Sensitive    | 301 (91)                                                     | 166 (88)                                                         | 467 (90)     |
|              | Intermediate | 22 (7)                                                       | 18 (10)                                                          | 40 (8)       |
|              | Resistant    | 6(2)                                                         | 4 (2)                                                            | 10 (2)       |
| Levofloxacin | Sensitive    | 41 (98)                                                      | 16 (94)                                                          | 57 (97)      |
|              | Resistant    | 1 (2)                                                        | 1 (6)                                                            | 2 (3)        |

2 Data are shown as number of patients (%). Percentages calculated on non-missing  
 3 data.

4

1 **Table E3. Empiric Antibiotic Therapy**

2

|                             | <b>Bacteremic<br/>pneumococcal<br/>pneumonia<br/>(n=362)</b> | <b>Non-bacteremic<br/>pneumococcal<br/>pneumonia<br/>(n=555)</b> | <b>p-value</b>   |
|-----------------------------|--------------------------------------------------------------|------------------------------------------------------------------|------------------|
| Known                       | 361                                                          | 551                                                              |                  |
| Monotherapy                 | 53 (15)                                                      | 143 (26)                                                         |                  |
| Quinolones                  | 34 (9)                                                       | 98 (18)                                                          | <b>&lt;0.001</b> |
| $\beta$ -Lactam             | 16 (4)                                                       | 35 (6)                                                           | 0.22             |
| Macrolide                   | 1 (0.3)                                                      | 5 (1)                                                            | 0.41             |
| Carbapenem                  | 1 (0.3)                                                      | 1 (0.2)                                                          | >0.99            |
| Mono- $\beta$ -Lactam       | 0 (0)                                                        | 1 (0.2)                                                          | >0.99            |
| Lincosamide                 | 1 (0.3)                                                      | 0 (0)                                                            | 0.40             |
| Glucoplectic                | 0 (0)                                                        | 1 (0.2)                                                          | >0.99            |
| Other                       | 0 (0)                                                        | 2 (0.4)                                                          | 0.52             |
| Combination therapy         | 308 (85)                                                     | 408 (72)                                                         |                  |
| Macrolide + $\beta$ -Lactam | 164 (45)                                                     | 255 (46)                                                         | 0.80             |
| Quinolone + $\beta$ -Lactam | 100 (28)                                                     | 101 (18)                                                         | <b>0.001</b>     |
| Quinolone + Macrolide       | 6 (2)                                                        | 6 (1)                                                            | 0.56             |
| Others                      | 38 (11)                                                      | 46 (8)                                                           | 0.27             |

3 Data are shown as number of patients (%). Percentages calculated on non-missing  
 4 data. The percentages of antibiotics are related to the number of patients with empiric  
 5 antibiotic treatment in each group.

6

**Table E4. Internal Validation of Prediction Model for Bacteremic Pneumococcal Pneumonia Using Nonparametric Bootstrap Technique**

| Variable                                    | Original | Bias   | SE    | 95% BCa CI        |
|---------------------------------------------|----------|--------|-------|-------------------|
| Year of occurrence of pneumonia before 2007 | 0.110    | 0.017  | 0.253 | -0.376 to 0.651   |
| Age ≥65 years                               | -0.141   | -0.003 | 0.244 | -0.614 to 0.356   |
| Women                                       | 0.026    | -0.008 | 0.246 | -0.449 to 0.519   |
| Nursing home resident                       | -2.101   | -6.519 | 9.268 | -21.335 to -0.521 |
| Multilobar involvement                      | 0.523    | 0.008  | 0.259 | 0.010 to 1.020    |
| Pleural effusion                            | 0.709    | 0.016  | 0.309 | 0.122 to 1.310    |
| C-reactive protein ≥20 mg/dL*               | 0.858    | -0.004 | 0.264 | 0.346 to 1.375    |

BCa indicates adjusted bootstrap; CI, confidence interval; SE, standard error. \* Optimal cut-off value to predict bacteremic CAP using ROC curves.

3  
4  
5  
6  
7  
8  
9  
10  
11  
12  
13  
14  
15  
16  
17  
18  
19  
20  
21  
22  
23  
24  
25  
26  
27  
28  
29  
30  
31  
32  
33  
34

1 **Table E5. Significant Univariate and Multivariate Logistic Regression Analyses for the**  
 2 **Prediction of ICU admission**

| Variable                                        | Univariate* |              |         | Multivariate <sup>#</sup> |            |         |
|-------------------------------------------------|-------------|--------------|---------|---------------------------|------------|---------|
|                                                 | OR          | 95% CI       | p-value | OR                        | 95% CI     | p-value |
| Year of occurrence of pneumonia before 2007     | 0.45        | 0.33-0.61    | <0.001  | 2.36                      | 1.29-4.34  | 0.006   |
| Age ≥65 years                                   | 0.53        | 0.39-0.73    | <0.001  | 0.19                      | 0.10-0.37  | <0.001  |
| Pneumococcal vaccination                        | 0.49        | 0.26-0.92    | 0.027   | -                         | -          | -       |
| Influenza vaccination                           | 0.60        | 0.40-0.89    | 0.011   | -                         | -          | -       |
| Previous antibiotics                            | 0.60        | 0.36-1.00    | 0.049   | -                         | -          | -       |
| Chronic liver disease                           | 2.17        | 1.30-3.62    | 0.003   | -                         | -          | -       |
| Dyspnoea                                        | 3.25        | 2.10-5.02    | <0.001  | -                         | -          | -       |
| Fever                                           | 0.62        | 0.42-0.91    | 0.015   | -                         | -          | -       |
| Confusion                                       | 1.81        | 1.26-2.59    | 0.001   | -                         | -          | -       |
| Creatinine ≥1.5 mg/dL                           | 2.78        | 2.01-3.86    | <0.001  | -                         | -          | -       |
| C-reactive protein ≥20 mg/dL <sup>†</sup>       | 1.76        | 1.21-2.56    | 0.003   | -                         | -          | -       |
| White-blood-cell count ≥10 x 10 <sup>9</sup> /L | 0.45        | 0.32-0.62    | <0.001  | 0.45                      | 0.23-0.87  | 0.017   |
| PaO <sub>2</sub> /FiO <sub>2</sub> <250 mmHg    | 2.60        | 1.83-3.70    | <0.001  | -                         | -          | -       |
| SatO <sub>2</sub> <92%                          | 1.51        | 1.03-2.21    | 0.034   | -                         | -          | -       |
| CURB-65 risk class 3-5                          | 2.45        | 1.74-3.46    | <0.001  | -                         | -          | -       |
| PSI risk class IV-V                             | 1.75        | 1.28-2.41    | 0.001   | -                         | -          | -       |
| Pleural effusion                                | 2.44        | 1.68-3.55    | <0.001  | -                         | -          | -       |
| Multilobar involvement                          | 3.54        | 2.55-4.91    | <0.001  | -                         | -          | -       |
| Respiratory distress                            | 8.50        | 4.22-17.11   | <0.001  | -                         | -          | -       |
| Acute renal failure                             | 2.77        | 2.00-3.82    | <0.001  | -                         | -          | -       |
| Septic shock                                    | 9.23        | 5.82-14.64   | <0.001  | 4.97                      | 1.84-13.39 | 0.002   |
| Mechanical ventilation <sup>‡</sup>             |             |              | <0.001  | -                         | -          | -       |
| No                                              | 1           | -            | -       | -                         | -          | -       |
| NIMV                                            | 43.45       | 14.84-127.24 | <0.001  | -                         | -          | -       |
| IMV                                             | 23.39       | 13.28-41.22  | <0.001  | -                         | -          | -       |
| LOS >8 days                                     | 6.05        | 4.26-8.61    | <0.001  | 4.94                      | 2.60-9.40  | <0.001  |
| β-Lactam                                        | 0.34        | 0.13-0.88    | 0.025   | -                         | -          | -       |
| Quinolone                                       | 0.27        | 0.14-0.52    | <0.001  | -                         | -          | -       |
| Quinolone + β-Lactam                            | 3.92        | 2.79-5.51    | <0.001  | 2.24                      | 1.23-4.09  | 0.008   |
| Macrolide + β-Lactam                            | 0.52        | 0.38-0.72    | <0.001  | -                         | -          | -       |
| Bacteremic pneumococcal pneumonia               | 1.42        | 1.04-1.94    | 0.026   | 1.51                      | 0.84-2.73  | 0.17    |

1 CI indicates confidence interval; ICU, intensive care unit; IMV, invasive mechanical  
2 ventilation; LOS, length of hospital stay; NIMV, non-invasive mechanical ventilation;  
3 OR, odds ratio. \* The variables analyzed in the univariate analysis were year of  
4 occurrence of pneumonia (<2007 vs. ≥2007), age (<65 years vs. ≥65 years), gender,  
5 systemic and inhaled corticosteroids, influenza and pneumococcal vaccination, prior  
6 antibiotic treatment, chronic pulmonary disease, chronic cardiovascular disease,  
7 chronic renal disease, chronic liver disease, diabetes mellitus, neurological disease,  
8 pneumonia in the past year, nursing home resident, cough, expectoration, dyspnoea,  
9 pleuritic pain, fever, confusion, creatinine (<1.5 mg/dL vs. ≥1.5 mg/dL), C-reactive  
10 protein (<20 mg/dL vs. ≥20 mg/dL), white-blood-cell count (<10 x10<sup>9</sup> cell/L vs. ≥10 x10<sup>9</sup>  
11 cell/L), SatO<sub>2</sub> (<92% vs. ≥92%), PaO<sub>2</sub>/FiO<sub>2</sub> (<250 mmHg vs. ≥250 mmHg), CURB-65 risk  
12 class (0-2 vs. 3-5), PSI risk class (I-III vs. IV-V), pleural effusion, multilobar involvement,  
13 respiratory distress, septic shock, acute renal failure, mechanical ventilation, LOS (≤8  
14 vs. >8 days), antibiotic treatment, and bacteremic pneumococcal pneumonia. #  
15 Hosmer-Lemeshow goodness-of-fit test, p=0.083. † Optimal cut-off value to predict  
16 bacteremic pneumococcal pneumonia using ROC curves. ‡ The p-value corresponds to  
17 differences between the three groups (no mechanical ventilation, NIMV, or IMV).

1 **Table E6. Significant Univariate and Multivariate Logistic Regression Analyses for the**  
 2 **Prediction of prolonged LOS**

| Variable                                        | Univariate* |             |         | Multivariate <sup>#</sup> |                 |         |
|-------------------------------------------------|-------------|-------------|---------|---------------------------|-----------------|---------|
|                                                 | OR          | 95% CI      | p-value | OR                        | 95% CI          | p-value |
| Year of occurrence of pneumonia before 2007     | 0.66        | 0.50-0.87   | 0.003   | 1.41                      | 0.83-2.40       | 0.20    |
| Age ≥65 years                                   | 1.27        | 0.97-1.66   | 0.078   | 1.85                      | 1.08-3.18       | 0.025   |
| Pneumococcal vaccination                        | 0.65        | 0.40-1.06   | 0.083   | -                         | -               | -       |
| Chronic renal disease                           | 1.79        | 1.05-3.04   | 0.033   | -                         | -               | -       |
| Chronic liver disease                           | 1.97        | 1.20-3.25   | 0.007   | -                         | -               | -       |
| Neurological disease                            | 1.98        | 1.34-2.94   | 0.001   | -                         | -               | -       |
| Nursing home resident                           | 3.86        | 1.85-8.09   | <0.001  | 14.0<br>3                 | 1.61-<br>122.20 | 0.017   |
| Cough                                           | 0.66        | 0.46-0.95   | 0.024   | -                         | -               | -       |
| Expectoration                                   | 0.70        | 0.52-0.93   | 0.015   | -                         | -               | -       |
| Dyspnoea                                        | 2.01        | 1.47-2.74   | <0.001  | -                         | -               | -       |
| Fever                                           | 0.64        | 0.45-0.91   | 0.014   | 0.29                      | 0.13-0.67       | 0.003   |
| Confusion                                       | 2.04        | 1.46-2.83   | <0.001  | -                         | -               | -       |
| Creatinine ≥1.5 mg/dL                           | 2.91        | 2.14-3.95   | <0.001  | -                         | -               | -       |
| C-reactive protein ≥20 mg/dL <sup>†</sup>       | 1.81        | 1.31-2.50   | <0.001  | -                         | -               | -       |
| White-blood-cell count ≥10 x 10 <sup>9</sup> /L | 0.59        | 0.43-0.79   | 0.001   | -                         | -               | -       |
| PaO <sub>2</sub> /FiO <sub>2</sub> <250 mmHg    | 2.73        | 1.97-3.78   | <0.001  | -                         | -               | -       |
| SatO <sub>2</sub> <92%                          | 2.01        | 1.41-2.85   | <0.001  | -                         | -               | -       |
| CURB-65 risk class 3-5                          | 2.49        | 1.80-3.43   | <0.001  | -                         | -               | -       |
| PSI risk class IV-V                             | 2.60        | 1.97-3.42   | <0.001  | -                         | -               | -       |
| Pleural effusion                                | 3.37        | 2.32-4.90   | <0.001  | 4.68                      | 2.33-9.43       | <0.001  |
| Multilobar involvement                          | 3.03        | 2.22-4.14   | <0.001  | -                         | -               | -       |
| Respiratory distress                            | 3.74        | 1.84-7.62   | <0.001  | -                         | -               | -       |
| Acute renal failure                             | 2.93        | 2.18-3.94   | <0.001  | -                         | -               | -       |
| Septic shock                                    | 4.37        | 2.70-7.05   | <0.001  | 3.70                      | 1.29-10.65      | 0.015   |
| Mechanical ventilation <sup>‡</sup>             |             |             | <0.001  | -                         | -               | -       |
| No                                              | 1           | -           | -       | -                         | -               | -       |
| NIMV                                            | 49.94       | 6.75-369.70 | <0.001  | -                         | -               | -       |
| IMV                                             | 7.51        | 4.26-13.26  | <0.001  | -                         | -               | -       |
| Site of care <sup>†</sup>                       |             |             | <0.001  | -                         | -               | -       |
| Outpatient                                      | -           | -           | -       | -                         | -               | -       |

| Variable                          | Univariate* |           |         | Multivariate <sup>#</sup> |           |         |
|-----------------------------------|-------------|-----------|---------|---------------------------|-----------|---------|
|                                   | OR          | 95% CI    | p-value | OR                        | 95% CI    | p-value |
| Ward                              | 1           | -         | -       | -                         | -         | -       |
| UCI                               | 5.38        | 3.78-7.66 | <0.001  | -                         | -         | -       |
| Quinolone                         | 0.29        | 0.18-0.46 | <0.001  | -                         | -         | -       |
| Quinolone + $\beta$ -Lactam       | 3.37        | 2.41-4.71 | <0.001  | 4.67                      | 2.64-8.25 | <0.001  |
| Macrolide + $\beta$ -Lactam       | 0.63        | 0.49-0.83 | 0.001   | -                         | -         | -       |
| Bacteremic pneumococcal pneumonia | 1.91        | 1.45-2.50 | <0.001  | 1.30                      | 0.75-2.26 | 0.35    |

1 CI indicates confidence interval; ICU, intensive care unit; IMV, invasive mechanical  
2 ventilation; LOS, length of hospital stay; NIMV, non-invasive mechanical ventilation;  
3 OR, odds ratio. \* The variables analyzed in the univariate analysis were year of  
4 occurrence of pneumonia (<2007 vs.  $\geq$ 2007), age (<65 years vs.  $\geq$ 65 years), gender,  
5 systemic and inhaled corticosteroids, influenza and pneumococcal vaccination, prior  
6 antibiotic treatment, chronic pulmonary disease, chronic cardiovascular disease,  
7 chronic renal disease, chronic liver disease, diabetes mellitus, neurological disease,  
8 pneumonia in the past year, nursing home resident, cough, expectoration, dyspnoea,  
9 pleuritic pain, fever, confusion, creatinine (<1.5 mg/dL vs.  $\geq$ 1.5 mg/dL), C-reactive  
10 protein (<20 mg/dL vs.  $\geq$ 20 mg/dL), white-blood-cell count (<10 x10<sup>9</sup> cell/L vs.  $\geq$ 10 x10<sup>9</sup>  
11 cell/L), SatO<sub>2</sub> (<92% vs.  $\geq$ 92%), PaO<sub>2</sub>/FiO<sub>2</sub> (<250 mmHg vs.  $\geq$ 250 mmHg), CURB-65 risk  
12 class (0-2 vs. 3-5), PSI risk class (I-III vs. IV-V), pleural effusion, multilobar involvement,  
13 respiratory distress, septic shock, acute renal failure, mechanical ventilation, site of  
14 care, antibiotic treatment, and bacteremic pneumococcal pneumonia. <sup>#</sup> Hosmer-  
15 Lemeshow goodness-of-fit test, p=0.95. <sup>†</sup> Optimal cut-off value to predict bacteremic  
16 pneumococcal pneumonia using ROC curves. <sup>‡</sup> The p-value corresponds to differences  
17 between the three groups (no mechanical ventilation, NIMV, or IMV).  
18



1 **Table E7. Significant Univariate and Multivariate Logistic Regression for the**  
 2 **Prediction of 30-day Mortality of the ICU Population**

| Variable                                    | Univariate* |            |         | Multivariate <sup>#</sup> |            |         |
|---------------------------------------------|-------------|------------|---------|---------------------------|------------|---------|
|                                             | OR          | 95%CI      | p-value | OR                        | 95%CI      | p-value |
| Year of occurrence of pneumonia before 2007 | 1.89        | 0.84-4.25  | 0.12    | 1.23                      | 0.32-4.80  | 0.76    |
| Age ≥65 years                               | 2.21        | 1.01-4.82  | 0.047   | 3.43                      | 1.10-10.69 | 0.034   |
| Chronic liver disease                       | 3.45        | 1.36-8.72  | 0.009   | 4.31                      | 1.23-15.12 | 0.023   |
| Diabetes mellitus                           | 2.17        | 0.90-5.25  | 0.086   | -                         | -          | -       |
| Cough                                       | 0.27        | 0.11-0.64  | 0.003   | 0.20                      | 0.06-0.66  | 0.008   |
| Expectoration                               | 0.29        | 0.13-0.66  | 0.003   | -                         | -          | -       |
| Pleuritic pain                              | 0.31        | 0.13-0.72  | 0.006   | -                         | -          | -       |
| Fever                                       | 0.23        | 0.10-0.52  | <0.001  | -                         | -          | -       |
| Confusion                                   | 3.58        | 1.63-7.84  | 0.001   | -                         | -          | -       |
| Creatinine >1.5 mg/dL                       | 1.96        | 0.91-4.25  | 0.087   | -                         | -          | -       |
| PaO <sub>2</sub> /FiO <sub>2</sub> <250     | 3.49        | 1.40-8.71  | 0.007   | -                         | -          | -       |
| CURB-65 risk class 3-5                      | 2.84        | 1.30-6.19  | 0.009   | -                         | -          | -       |
| PSI risk class IV-V                         | 2.96        | 1.08-8.13  | 0.035   | -                         | -          | -       |
| Respiratory distress                        | 3.18        | 1.26-8.01  | 0.014   | -                         | -          | -       |
| Acute renal failure                         | 2.73        | 1.22-6.15  | 0.015   | -                         | -          | -       |
| Septic shock                                | 3.52        | 1.61-7.70  | 0.002   | -                         | -          | -       |
| Mechanical ventilation <sup>†</sup>         |             |            | <0.001  |                           |            | <0.001  |
| No                                          | 1           | -          | -       | 1                         | -          | -       |
| NIV                                         | 1.72        | 0.31-9.51  | 0.53    | 3.94                      | 0.55-28.16 | 0.17    |
| IMV                                         | 9.96        | 3.51-28.27 | <0.001  | 14.17                     | 3.73-53.84 | <0.001  |
| Bacteremic pneumococcal pneumonia           | 0.65        | 0.30-1.41  | 0.28    | 0.89                      | 0.31-2.58  | 0.83    |

3 CI indicates confidence interval; CURB-65, consciousness, urea, respiratory rate, blood  
 4 pressure, 65 years old; ICU, intensive care unit; IMV, invasive mechanical ventilation;  
 5 NIV, Non-invasive mechanical ventilation; PSI, pneumonia severity index; OR, odds  
 6 ratio. \* The variables analyzed in the univariate analysis were year of occurrence of  
 7 pneumonia (<2007 vs. ≥2007), age (<65 years vs. ≥65 years), gender, systemic and  
 8 inhaled corticosteroids, influenza and pneumococcal vaccination, prior antibiotic  
 9 treatment, chronic pulmonary disease, chronic cardiovascular disease, chronic renal  
 10 disease, chronic liver disease, diabetes mellitus, neurological disease, pneumonia in  
 11 the past year, nursing home resident, cough, expectoration, dyspnoea, pleuritic pain,  
 12 fever, confusion, creatinine (<1.5 mg/dL vs. ≥1.5 mg/dL), C-reactive protein (<20 mg/dL  
 13 vs. ≥20 mg/dL), white-blood-cell count (<10 x10<sup>9</sup> cell/L vs. ≥10 x10<sup>9</sup> cell/L), SatO<sub>2</sub> (<92%  
 14 vs. ≥92%), PaO<sub>2</sub>/FiO<sub>2</sub> (<250 mmHg vs. ≥250 mmHg), CURB-65 risk class (0-2 vs. 3-5), PSI  
 15 risk class (I-III vs. IV-V), pleural effusion, multilobar involvement, respiratory distress,

1 septic shock, acute renal failure, mechanical ventilation, LOS ( $\leq 8$  vs.  $> 8$  days), antibiotic  
2 treatment, and bacteremic pneumococcal pneumonia. # Hosmer-Lemeshow goodness-  
3 of-fit test,  $p=0.97$ . † The p-value corresponds to differences between the three groups  
4 (no mechanical ventilation, NIV, or IMV).

1 **Table E8. Significant Univariate and Multivariate Logistic Regression for the**  
 2 **Prediction of 30-day Mortality in the Bacteremic Population**

| Variable                                    | Univariate* |            |         | Multivariate <sup>#</sup> |             |         |
|---------------------------------------------|-------------|------------|---------|---------------------------|-------------|---------|
|                                             | OR          | 95% CI     | p-value | OR                        | 95% CI      | p-value |
| Year of occurrence of pneumonia before 2007 | 0.91        | 0.39-2.17  | 0.84    | 1.02                      | 0.23-4.56   | 0.98    |
| Age ≥65 years                               | 3.59        | 1.41-9.15  | 0.007   | -                         | -           | -       |
| Chronic renal failure                       | 3.36        | 1.03-10.96 | 0.044   | -                         | -           | -       |
| Chronic liver disease                       | 3.07        | 1.14-8.27  | 0.027   | -                         | -           | -       |
| Neurological disease                        | 3.12        | 1.27-7.69  | 0.013   | -                         | -           | -       |
| Cough                                       | 0.42        | 0.17-1.06  | 0.067   | -                         | -           | -       |
| Expectoration                               | 0.44        | 0.19-1.02  | 0.055   | -                         | -           | -       |
| Pleuritic pain                              | 0.34        | 0.15-0.80  | 0.013   | 0.15                      | 0.03-0.72   | 0.017   |
| Fever                                       | 0.21        | 0.09-0.52  | 0.001   | 0.17                      | 0.04-0.75   | 0.020   |
| Confusion                                   | 5.23        | 2.33-11.77 | <0.001  | 6.46                      | 1.45-28.71  | 0.014   |
| Creatinine >1.5 mg/dL                       | 6.15        | 2.59-14.57 | <0.001  | -                         | -           | -       |
| SatO <sub>2</sub> <92%                      | 3.44        | 1.27-9.33  | 0.015   | -                         | -           | -       |
| PaO <sub>2</sub> /FiO <sub>2</sub> <250     | 2.90        | 1.23-6.85  | 0.015   | -                         | -           | -       |
| CURB-65 risk class 3-5                      | 7.78        | 3.24-18.66 | <0.001  | -                         | -           | -       |
| Multilobar involvement                      | 3.83        | 1.69-8.69  | 0.001   | -                         | -           | -       |
| Respiratory distress                        | 15.22       | 5.12-45.27 | <0.001  | 14.00                     | 1.65-118.72 | 0.016   |
| Acute renal failure                         | 9.98        | 3.67-27.17 | <0.001  | 11.61                     | 2.12-63.72  | 0.005   |
| Septic shock                                | 10.25       | 4.40-23.89 | <0.001  | 5.36                      | 1.36-21.07  | 0.016   |
| Site of care <sup>†</sup>                   |             |            | 0.14    | -                         | -           | -       |
| Outpatient                                  | -           | -          | -       | -                         | -           | -       |
| Ward                                        | 1           | -          | -       | -                         | -           | -       |
| UCI                                         | 2.25        | 1.01-5.03  | 0.047   | -                         | -           | -       |
| Mechanical ventilation <sup>‡</sup>         |             |            | <0.001  | -                         | -           | -       |
| No                                          | 1           | -          | -       | -                         | -           | -       |
| NIV                                         | 1.82        | 0.22-15.17 | 0.58    | -                         | -           | -       |
| IMV                                         | 14.56       | 5.73-36.96 | <0.001  | -                         | -           | -       |
| Quinolone + β-Lactam                        | 2.04        | 0.91-4.60  | 0.083   | -                         | -           | -       |

3 CI indicates confidence interval; CURB-65, consciousness, urea, respiratory rate, blood  
 4 pressure, 65 years old; IMV, invasive mechanical ventilation; NIV, Non-invasive  
 5 mechanical ventilation; OR, odds ratio. \* The variables analyzed in the univariate  
 6 analysis were year of occurrence of pneumonia (<2007 vs. ≥2007), age (<65 years vs.  
 7 ≥65 years), gender, systemic and inhaled corticosteroids, influenza and pneumococcal

1 vaccination, prior antibiotic treatment, chronic pulmonary disease, chronic  
2 cardiovascular disease, chronic renal disease, chronic liver disease, diabetes mellitus,  
3 neurological disease, pneumonia in the past year, nursing home resident, cough,  
4 expectoration, dyspnoea, pleuritic pain, fever, confusion, creatinine (<1.5 mg/dL vs.  
5  $\geq 1.5$  mg/dL), C-reactive protein (<20 mg/dL vs.  $\geq 20$  mg/dL), white-blood-cell count  
6 (< $10 \times 10^9$  cell/L vs.  $\geq 10 \times 10^9$  cell/L), SatO<sub>2</sub> (<92% vs.  $\geq 92\%$ ), PaO<sub>2</sub>/FiO<sub>2</sub> (<250 mmHg vs.  
7  $\geq 250$  mmHg), CURB-65 risk class (0-2 vs. 3-5), PSI risk class (I-III vs. IV-V), pleural  
8 effusion, multilobar involvement, respiratory distress, septic shock, acute renal failure,  
9 mechanical ventilation, site of care, LOS ( $\leq 8$  vs.  $> 8$  days), and antibiotic treatment. #  
10 Hosmer-Lemeshow goodness-of-fit test,  $p=0.40$ . † The p-value corresponds to  
11 differences between the three groups (outpatient, ward, or ICU). ‡ The p-value  
12 corresponds to differences between the three groups (no mechanical ventilation, NIV,  
13 or IMV).  
14
